# Supplementary material
Source: PubMed Central journal article supplement (PMC9117483)
Supplement: NIHMS1789262-supplement-Supplemental_Publication_Material.pdf [file NIHMS1789262-supplement-Supplemental_Publication_Material.pdf]

# SUPPLEMENTAL MATERIAL

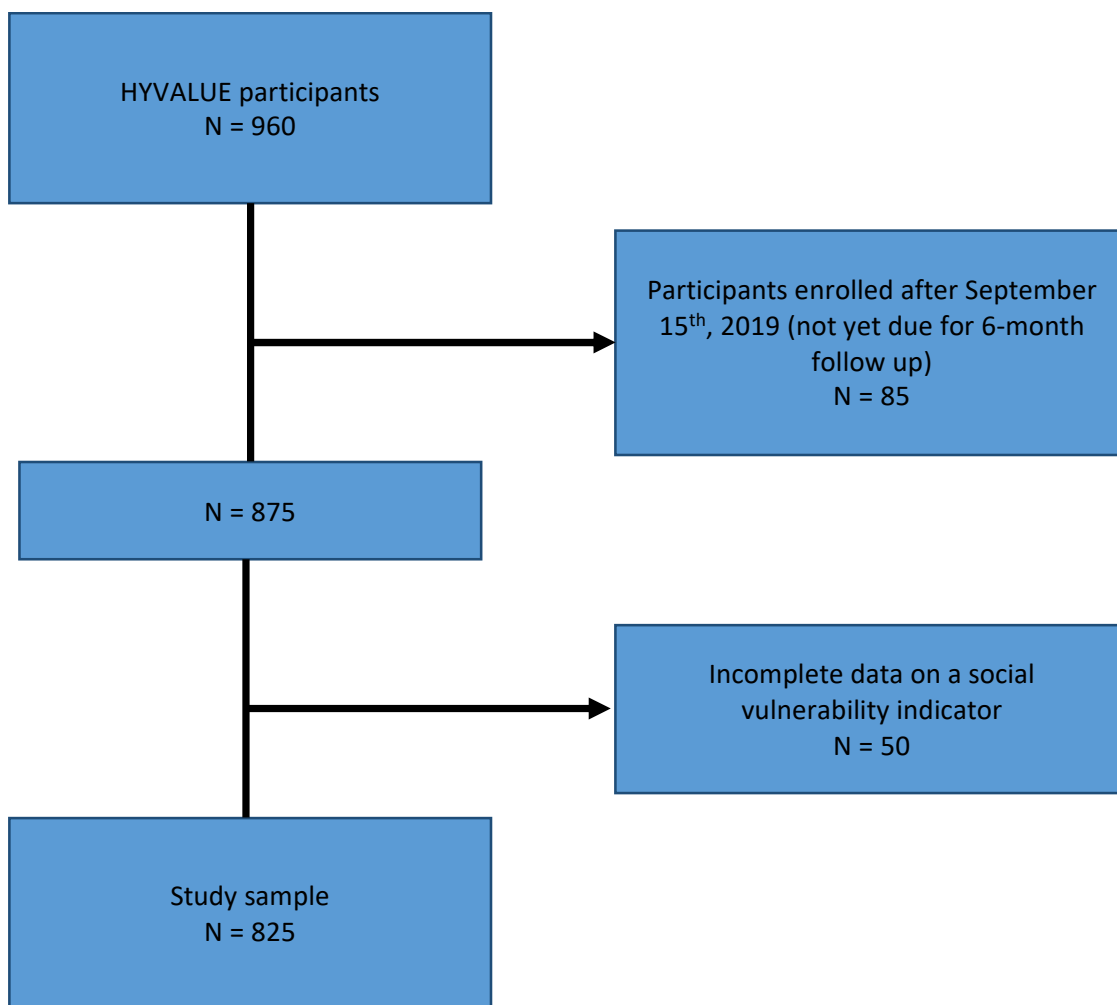

**Figure S1.** Flow chart of final study population.

Table S1. Comparison of categorical financial-resource strain by type of follow up achieved.

|                                                        | <b>Percent of sample<br/>in category<br/>(column % (N))</b><br><br><b>N = 825</b> | <b>Percent (N) with<br/>no follow-up<br/>visits</b> | <b>p-value</b> | <b>Percent (N) with<br/>at least one<br/>missing follow-<br/>up visit</b> | <b>p-value</b> |
|--------------------------------------------------------|-----------------------------------------------------------------------------------|-----------------------------------------------------|----------------|---------------------------------------------------------------------------|----------------|
| Difficulty paying for basics<br>in the last 3 months.* |                                                                                   |                                                     |                |                                                                           |                |
| Not hard at all                                        | 58.4% (482)                                                                       | 15.4% (74)                                          | <0.0001        | 36.5% (176)                                                               | <0.0001        |
| Somewhat hard                                          | 29.2% (241)                                                                       | 29.0% (70)                                          |                | 53.1% (128)                                                               |                |
| Very hard                                              | 12.4% (102)                                                                       | 28.4% (29)                                          |                | 54.9% (56)                                                                |                |

\*Study participants were asked “difficulty paying for very basics like food, housing, medical care, and heating within the last three months”. Participants rated their difficulty along an ordinal scale: (i) very hard, (ii) somewhat hard, and (iii) not hard at all.

Supplement Table S2. ICD-9 and ICD-10 CM Diagnostic Codes Used to Define Clinical Comorbidities to Adjust for in the Log-Binomial Models.

| Clinical Variables          | ICD-9                                                                                                                                                        | ICD-10                                                                                                                |
|-----------------------------|--------------------------------------------------------------------------------------------------------------------------------------------------------------|-----------------------------------------------------------------------------------------------------------------------|
| Circulatory system disease* | 093.0, 362.34, 410, 411, 412, 413, 414, 430, 431, 432, 433, 434, 435, 436, 437, 438, 437.3, 440, 441, 443.1, 443.2, 443.8, 443.9, 447.1, 557.9, 557.1, V43.4 | I20-I25, I70, I71, I73.1, I73.8, I73.9, I77.1, I79.0, I79.2, K55.1, K55.8, K55.9, Z95.8, Z95.9, G45-G46, H34, I60-I69 |
| Cardiac arrhythmia          | 426, 427, 785.0, 996.01, 996.04, V45.0, V53.3                                                                                                                | I44.1, I44.2, I44.3, I45.6, I45.9, I47, I48, I49, R00.0, R00.1, R00.8, T82.1, Z45.0, Z95.0                            |
| Congestive heart failure    | 398.91, 402.01, 402.11, 402.91, 404.01, 404.03, 404.11, 404.13, 404.91, 404.93, 425.4-425.9, 428                                                             | I09.0, I11.0, I13.0, I13.2, I25.5, I42.0, I42.5, I42.6-I42.9, I43, I50, P29.0                                         |
| Renal Failure               | 403.01, 403.11, 403.91, 404.02, 404.03, 404.12, 404.13, 404.92, 404.93, 585, 586, 588.0, V56, V42.0, V45.1                                                   | I12.0, I13.1, N18, N19, N25.0, Z49.0, Z49.1, Z49.2, Z94.0, Z99.2                                                      |
| Depression                  | 296.2, 296.3, 296.5, 300.4, 309, 311                                                                                                                         | F20.4, F31.3, F31.4, F31.5, F32, F33, F34.1, F41.2, F43.2                                                             |

Abbreviations: ICD, International Classification of Diseases; CM, Clinical Modification

\*Circulatory system disease consisted of the following: ischemic heart disease, peripheral vascular disease, valvular heart disease, and cerebrovascular disease.

Supplement Table S3. Comparison between adjusted risk ratios for full attrition to no attrition or partial attrition by treatment arm (intervention vs control arm).

|                                        | Intervention Arm<br>(95% CI) | Control Arm<br>(95% CI) |
|----------------------------------------|------------------------------|-------------------------|
| Social Vulnerability Indicator         |                              |                         |
| African American/Black                 | 1.02 (0.70–1.48)             | 1.71 (1.08–2.68)*       |
| Female                                 | 0.79 (0.55–1.12)             | 0.89 (0.60–1.32)        |
| High school or less                    | 1.44 (0.96–2.15)             | 1.06 (0.69–1.63)        |
| Financial resource strain <sup>†</sup> | 1.74 (1.18–2.57)*            | 1.70 (1.11–2.63)*       |
| Unemployed                             | 0.88 (0.57–1.37)             | 1.07 (0.68–1.68)        |
| Uninsured                              | 0.91 (0.38–2.21)             | 1.08 (0.48–2.44)        |

The log-binomial models controlled for other social vulnerable indicators and the number of participant medical comorbidities.

\*Value statistically significant with  $p$ -value <0.05

<sup>†</sup>Financial resource strain was determined by participants' self-reported level of difficulty paying for very basics like food, housing, medical care, and heating within the 3 months prior to enrolling into the trial. Participants who reported paying for basics was 'somewhat hard' or 'very hard' were categorized as having financial-resource strain.
